# Supplementary material
Source: publisher figshare collection journal article supplement (https://springernature.figshare.com/ndownloader/files/12416660)
Supplement: Supplementary file [file 12416660]

**Additional file 1. 3D7 accumulates more melanin than 3D1.** Means and standard errors of gray values (0 = black, 255 = white) of at least 60 colonies of *Z. tritici* strains 3D1 and 3D7 at 7 - 12 days post inoculation (dpi). The experiment was performed three times with similar results. Asterisks indicate significant differences between 3D1 and 3D7 at each time point according to Kruskal-Wallis test (p-values  $\leq 0.05$ ). n = number of colonies analyzed.

| Strains<br>dpi | 3D1<br>(n=64)   |                | 3D7<br>(n=70)   |                | p-value<br>(Kruskal-Wallis) |
|----------------|-----------------|----------------|-----------------|----------------|-----------------------------|
|                | Mean Gray Value | Standard error | Mean Gray Value | Standard error |                             |
| 7              | 133             | 1.7            | 87              | 2.4            | < 2.2e-16*                  |
| 8              | 110             | 2.5            | 65              | 2.2            | < 2.2e-16*                  |
| 9              | 80              | 1.7            | 63              | 1.0            | 6.7e-14*                    |
| 10             | 69              | 1.2            | 58              | 1.6            | 6.2e-12*                    |
| 11             | 64              | 1.1            | 57              | 3.7            | 0.14                        |
| 12             | 46              | 1.0            | 50              | 1.3            | 0.05                        |
